# Supplementary material for: Near‐Death Cells Cause Chemotherapy‐Induced Metastasis via ATF4‐Mediated NF‐κB Signaling Activation
Source: PubMed Central journal article supplement (PMC10074103; doi:10.1002/advs.202205835), 2023-02-05
Supplement: ADVS-10-2205835-s001.pdf [file ADVS-10-2205835-s001.pdf]

## Supporting Information

for *Adv. Sci.*, DOI 10.1002/adv.202205835

Near-Death Cells Cause Chemotherapy-Induced Metastasis via ATF4-Mediated NF- $\kappa$ B Signaling Activation

*Chenchen Zhu, Pei Liu, Chuan-Yuan Li, Yuli Zhang, Jiang Yin, Linlin Hou, Guopei Zheng and Xinjian Liu\**

## **Supporting Information**

**Title: Near-death cells cause chemotherapy-induced metastasis via ATF4-mediated NF- $\kappa$ B signaling activation**

**Authors:** Chenchen Zhu, Pei Liu, Chuan-Yuan Li, Yuli Zhang, Jiang Yin, Linlin Hou, Guopei Zheng, Xinjian Liu\*

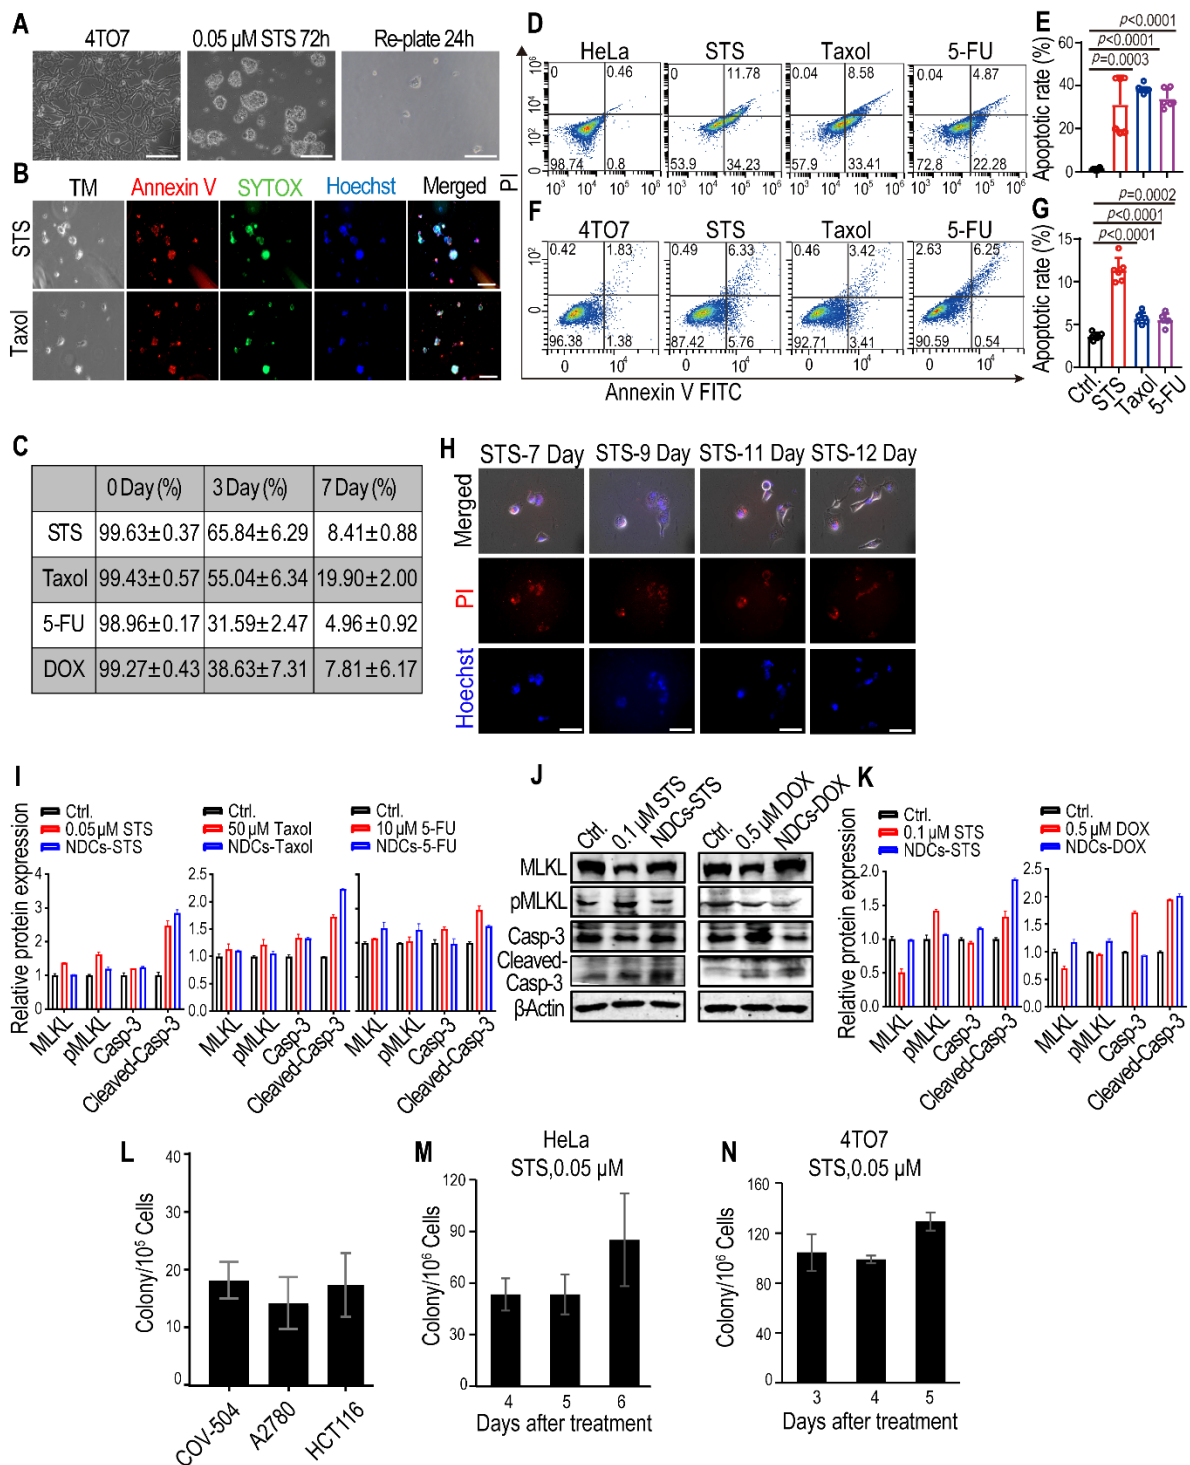

**Figure S1. Cytotoxin-induced near-death cancer cells.** A) Representative images of normal cultured parental 4TO7 cells (left panel), floating 4TO7 cells after  $0.05 \times 10^{-6}$  M STS treatment for 72 h (middle panel), and the status of adherent of floating STS-treated 4TO7 cells for 24 h (right panel). The scale bars represent 200  $\mu\text{m}$ . B) Annexin V-PE/SYTOX-Green/Hoechst staining showing compromised plasma membrane of adherent cells derived from  $0.05 \times 10^{-6}$  M STS- (upper panel) and  $50 \times 10^{-6}$  M Taxol-induced (lower panel) floating 4TO7 cells. TM presents transmission light images. The scale bars represent 100  $\mu\text{m}$ . C) The percentage of SYTOX-Green positive in all re-adherent cells. The statistical data of Figure 1D-G. Data are presented as the mean  $\pm$  SEM,  $n = 3$ . D-G) Apoptosis analyses of repopulated cancer cells (Day 30) from cytotoxin-induced floating HeLa cells (D,E) and 4TO7 cells (F,G) by flow cytometry. High percentage of apoptotic cells existed in cytotoxin-treated

repopulation cancer cells even after 30 days culture in comparison with that of parental cancer cells. Data are presented as mean  $\pm$  SEM.  $n = 3$  biological replicates.  $p$  values were determined by Student's  $t$ -test. H) 4TO7 cells were treated with STS at dose of  $0.05 \times 10^{-6}$  M for 4 days, then the floating cells were plated on 6-well plate with fresh medium. Attached cells were stained with PI ( $0.5 \text{ mg ml}^{-1}$ ) and Hoechst 33258 ( $10 \text{ mg ml}^{-1}$ ) on day 1 after replating, then the cell division was tracked on day 7, 9, 11 and 12. The scale bars represent  $100 \mu\text{m}$ . I) The quantitative analyses of Figure 1I. J) Western blot images and K) quantification of the expression of apoptosis (cleaved caspase-3, total caspase-3), necroptosis (phosphor-MLKL, pMLKL) markers in cytotoxin-treated cells (harvested on 72 h after treatment) and cytotoxin-derived HeLa NDCs.  $\beta$ -Actin was used as the protein loading control. L) Crystal violet staining analyses the number of colonies developed from  $1 \times 10^5$  floating dying COV-504, A2780 ovarian cancer cells and HCT116 colorectal cancer cells after STS treatment ( $0.2 \times 10^{-6}$  M for COV-504, and A2780,  $0.05 \times 10^{-6}$  M for HCT116). Data are presented as mean  $\pm$  SD.  $n = 2$  biological replicates. M-N) Crystal violet staining analyses the number of colonies developed from  $1 \times 10^6$  floating dying HeLa cells (M), and 4TO7 cells (N), which collected and replated on indicated time after treatment with  $0.05 \times 10^{-6}$  M STS. Data are presented as mean  $\pm$  SEM.  $n = 3$  biological replicates.

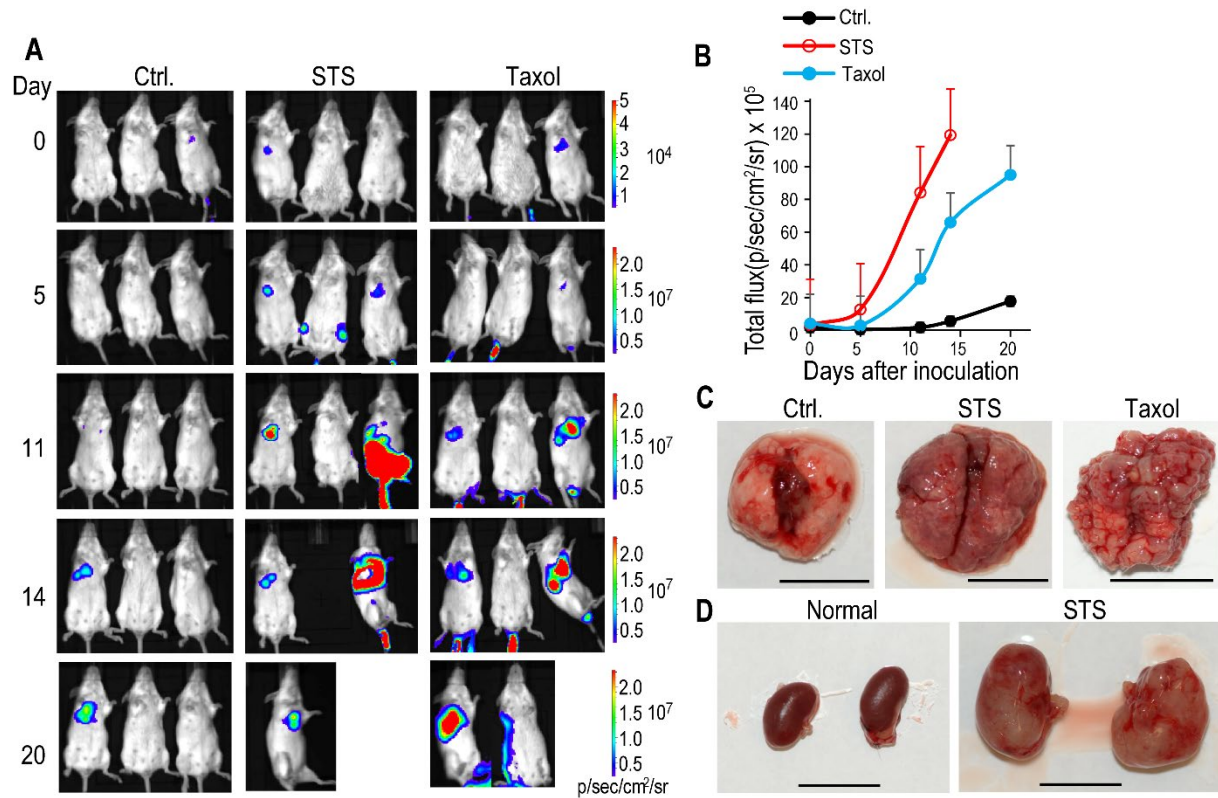

**Figure S2. Floating dying cells gain the metastasis ability.** A) Representative bioluminescent images of BALB/c mice with intravenous inoculation  $2 \times 10^5$  4TO7-Luc cells (Ctrl.) or floating dying cells without recovery that collected on day 5 after  $0.05 \times 10^{-6}$  M STS or  $50 \times 10^{-6}$  M Taxol treatment. B) The dynamic quantitative analysis of the bioluminescence intensity in Figure S2A. Data are presented as mean  $\pm$  SEM.  $n = 3$  mice per group. C) Representative gross photography showing apparent pulmonary metastases in lungs of mice that intravenous inoculation with STS- and Taxol-treated 4TO7-Luc cells. D) Gross photography showing the kidney metastasis after 11 days of intravenous inoculation floating cells derived from STS-treated 4TO7-Luc cells (right panel). Left panel shows the kidneys of normal BALB/c mouse. The scale bars in (C) and (D) present 1 cm.

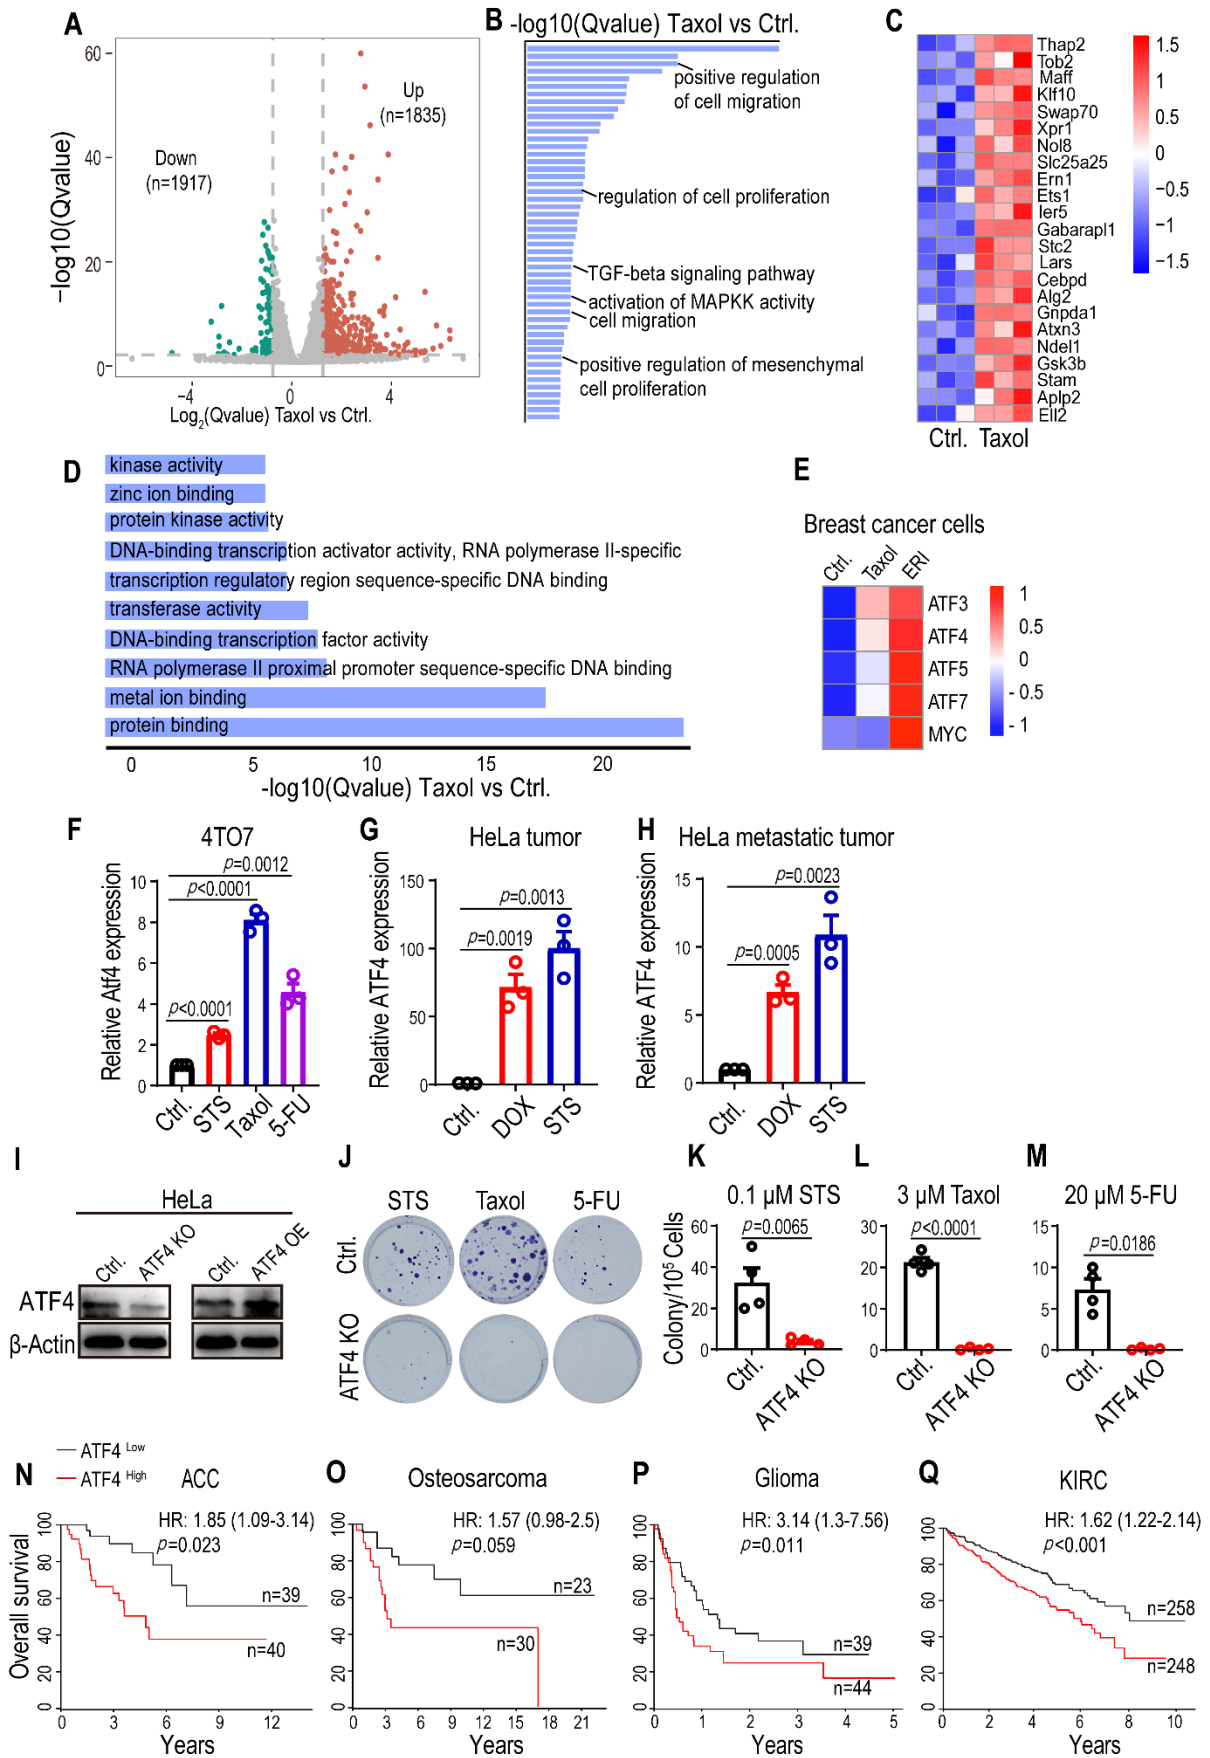

**Figure S3. ATF4 plays an essential role in cancers after chemotherapy.** A) Volcano plot analysis of differentially gene expression in 4TO7 Ctrl., and Taxol-induced NDCs. B) GO enrichment analysis of 3752 differential genes that positively enriched in proliferation and migration signal pathways in Taxol-induced 4TO7 NDCs. C) Heatmap analyses showing high expression of 23 invasion-related genes in Taxol-induced 4TO7 NDCs. D) KEGG analysis showing enrichment transcription factor-related signaling pathways in Taxol-induced 4TO7 NDCs. E) Heatmap analyses of 27 breast cancer cell lines showing high expression of activating transcription factor genes and MYC in Taxol- and ERI-treated breast cancer cells. F) RT-PCR analyses the expression of *Atf4* in 4TO7 cells, NDCs derived from STS-, Taxol-, and 5-FU-treated 4TO7 cells. Data are presented as mean  $\pm$  SEM.  $n = 3$ .  $p$  values were determined by Student's t-test. G,H) RT-PCR analyses the expression of *ATF4* in primary tumor tissues (G) and metastatic tumor tissues (H) derived from cytotoxin-induced HeLa-Luc NDCs ( $n = 3$  mice per group). Data are presented as mean  $\pm$  SEM.  $p$  values were determined by Student's t-test. I) ATF4 expression in HeLa cells with an ATF4 knockout (ATF4 KO) (left panel), and ATF4 over-expression (ATF4 OE) (right panel).  $\beta$ -Actin was used as protein loading control. J) Representative crystal violet staining and the numbers of repopulated colonies from  $1 \times 10^5$  floating HeLa cells or HeLa-ATF4 KO cells that collected and re-plated after K)  $0.1 \times 10^{-6}$  M STS, L)  $3 \times 10^{-6}$  M Taxol or M)  $20 \times 10^{-6}$  M 5-FU treatment for 72 h. Data are presented as mean  $\pm$  SEM.  $n = 4$  biological replicates.  $p$  values were determined by Student's t-test. N-Q) High ATF4 expression was strongly associated with worsened outcome in human cancers (ACC, Osteosarcoma, Glioma, KIRC). The patients were arbitrarily classified into ATF4-high and ATF4-low groups. The online tool PROGgene V2 was used, and the Kaplan-Meier curves of survival are shown. For the log-rank test,  $p$  values and hazard ratios (HR) are indicated.

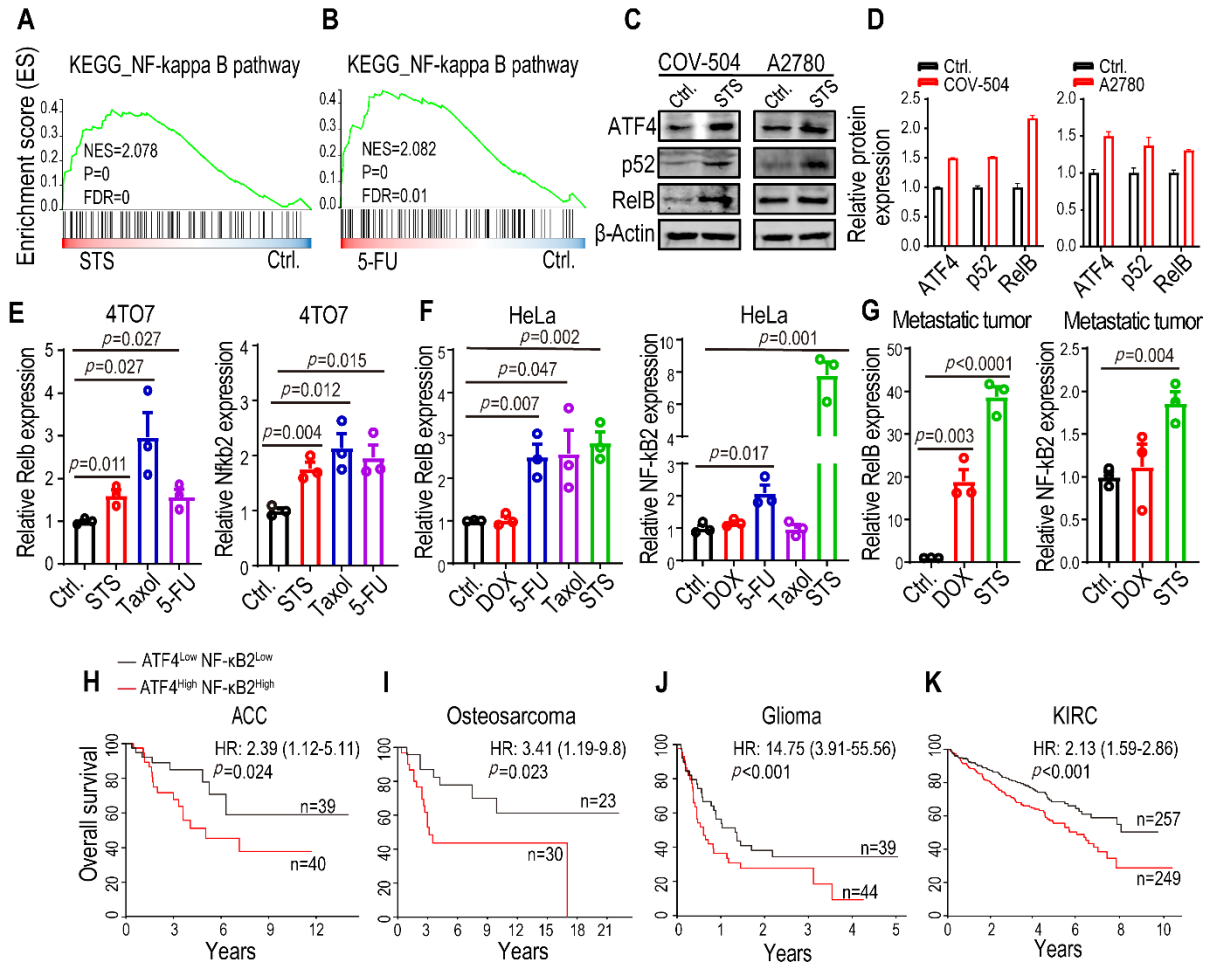

**Figure S4. ATF4/NF-κB2 plays a key role in a variety of human cancers.** A,B) GSEA analysis showing the significant enrichment of NF-κB signaling pathway in STS- (A), 5-FU-induced NDCs 4TO7 (B) (25 days recovery after  $0.05 \times 10^{-6}$  M STS, and  $10 \times 10^{-6}$  M 5-FU treatment for 72 h). C) Western blot images and D) quantification of ATF4, p52, and RelB expression in  $0.2 \times 10^{-6}$  M STS treatment-derived COV-504 and A2780 NDCs. β-Actin was used as protein loading control. E,F) RT-PCR analyses the expression of *RelB* (left panel) and *NF-κB2* (right panel) in control cells, cytotoxin-induced 4TO7 NDCs (E) and HeLa NDCs (F). Data are presented as mean ± SEM.  $n = 3$ .  $p$  values were determined by Student's t-test. G) RT-PCR analyses the expression of *RelB* (left panel) and *NF-κB2* (right panel) in metastatic tumor tissues from cytotoxin-induced NDCs HeLa-Luc. ( $n = 3$  tumor per group). Data are presented as mean ± SEM.  $p$  values were determined by Student's t-test. H-K) High co-expression of ATF4/NF-κB2 was strongly associated with worsened outcome in human cancers (ACC, Osteosarcoma, Glioma, KIRC). The patients were arbitrarily classified into ATF4-high/NF-κB2-high and ATF4-low/NF-κB2-low group. The online tool PROGene V2 was used, and the Kaplan-Meier curves of survival are shown. For the log-rank test,  $p$  values and hazard ratios (HR) are indicated.



## **Supplementary Methods**

### **Cells culture conditions**

HeLa human cervical cancer cells were obtained from Cell Culture Facility of Chinese Academy of Sciences. Its identity was verified by the STR method. 4TO7 mouse breast cancer cell line, highly tumorigenic but non-metastatic, was a kind gift from Dr. Mark W. Dewhirst from Duke University. Human ovarian carcinoma cells COV-504, and A2780 were obtained from Guangzhou Cellcook Biotech Co. Ltd. Human colorectal carcinoma cells HCT116, 293T cells were purchased from ATCC (Manassas, VA). 4TO7, HeLa cells were grown in RPMI-1640 (Gibico, Thermo Scientific) with 10% fetal bovine serum (FBS), penicillin (100 units ml<sup>-1</sup>), and streptomycin (100 µg ml<sup>-1</sup>). HCT116, 293T, COV-504 and A2780 cells were grown in DMEM (Gibico, Thermo Scientific) containing 10% fetal bovine serum (FBS, Gibico, Thermo Scientific), penicillin (100 units ml<sup>-1</sup>), and streptomycin (100 µg ml<sup>-1</sup>). All cell lines were subjected to mycoplasma test periodically by use of the Universal Mycoplasma Detection Kit (ATCC).

### **Construction of lentivirus vectors**

Knockout cells were generated with lentivirus-mediated CRISPR-Cas9 technology. Single guided RNA (sgRNA) sequences were designed using a public-domain online CRISPR design tool. The oligonucleotides used for sgRNA cloning and recombinant plasmid sequencing were listed in Table S2. Double-stranded oligonucleotides encoding the sgRNA sequences were cloned into BsmBI (Thermo Fisher Scientific) digested plasmid LentiCRISPRv2 (deposited by F. Zhang of MIT to Addgene, Cambridge, MA) which co-expresses Cas9 and sgRNA in a single

vector. The sgRNA-encoding CRISPR lentivirus vectors were then produced using an established protocol from the Trono laboratory (<https://www.epfl.ch/labs/tronolab/laboratory-of-virology-and-genetics/lentivectors-toolbox/>). To generate the knockout cell lines, target cells were infected with sgRNA-encoding CRISPR lentivirus and cultured in RPMI-1640 with 10% FBS and selected in hygromycin (200  $\mu\text{g ml}^{-1}$  for HeLa cells, 300  $\mu\text{g ml}^{-1}$  for 4TO7 cells) for 7-10 days. Full-length mouse and human *ATF4* were generated by PCR from cDNA derived from the 4TO7 cells and 293T cells. These fragments were then cloned into the pLEX-MCS lentiviral vector for gene expression. DNA sequence for the HA tag was constructed to the 3' end of *ATF4*. The primers used to construct the recombinant vector and recombinant plasmid sequencing were listed in Table S2.

### **Plasma membrane integrity and apoptosis analysis**

The floating cells after cytotoxin exposure and control cells were labeled with SYTOX-Green nucleic acid (Invitrogen, Cat#S11348) and Annexin V-PE (Beijing 4A Biotech, Cat#FXP027) according to manufacturer's instructions. The processed samples were analyzed by use of CytoFLEX Flow Cytometer.

### **Mouse models**

$2 \times 10^5$  floating cells without recovery by Taxol- and STS-treatment and 4TO7-Luc cells were intravenously injected into the tail vein of BALB/c mice. Mice were anesthetized with isoflurane and injected (intraperitoneally) with D-luciferin potassium salt (GOLDBIO) at dose of (150 mg  $\text{kg}^{-1}$ ) on days 0, 5, 11, 14 and 20 after tumor cells injection. 4TO7-Luc lung

metastases were assessed by in vivo bioluminescence imaging using IVIS Spectrum. The integrated light intensity measured by single photon counting with 10-minute exposure was used to quantify the amount of light emitted by 4TO7-Luc cells. A low-intensity visible light image was made for overlay images.

**Table S1. Key resources used in this study**

| Reagent or Resource                            | Source                                                                                                                | Identifier     |
|------------------------------------------------|-----------------------------------------------------------------------------------------------------------------------|----------------|
| Peroxidase Blockers                            | ZSGB-BIO                                                                                                              | Cat# PV-6000   |
| DAB                                            | ZSGB-BIO                                                                                                              | Cat#ZLI-9017   |
| TRIzol™ reagent                                | Invitrogen                                                                                                            | Cat#44894      |
| Isoflurane                                     | RWD                                                                                                                   | Cat#R510-22-10 |
| Staurosporine                                  | Cell Signaling Technology                                                                                             | Cat#9953S      |
| Paclitaxel                                     | MedChemExpress (MCE)                                                                                                  | Cat#HY-B0015   |
| 5-fluorouracil                                 | MedChemExpress (MCE)                                                                                                  | Cat#HY-90006   |
| Doxorubicin                                    | Selleckchem                                                                                                           | Cat#S1208      |
| SYTOX-Green                                    | Invitrogen                                                                                                            | Cat#S11348     |
| Annexin V-PE                                   | Beijing 4A Biotech                                                                                                    | Cat#FXP027     |
| Hoechst 33258                                  | Sigma-Aldrich                                                                                                         | Cat#B1155      |
| RPMI-1640                                      | Gibico                                                                                                                | Cat#31800022   |
| DMEM                                           | Gibico                                                                                                                | Cat#12800017   |
| Trypsin-EDTA                                   | ThermoFisher                                                                                                          | Cat#25200072   |
| Fetal Bovine Serum                             | Gibico                                                                                                                | Cat#10100-147  |
| BsmBI                                          | ThermoFisher                                                                                                          | Cat#FD0454     |
| D-luciferin potassium salt                     | GOLDBIO                                                                                                               | Cat#MB102      |
| D-luciferin potassium salt                     | Beyotime                                                                                                              | Cat#ST196      |
| Annexin V-FITC Apoptosis kit                   | MultiSciences                                                                                                         | Cat#AP101      |
| Nuclear and Cytoplasmic Protein Extraction Kit | Beyotime                                                                                                              | Cat#P0028      |
| Superscript II reverse transcriptase           | Invitrogen                                                                                                            | Cat#18064-014  |
| SYBR Green Pro Taq HS kit                      | Accurate Biology                                                                                                      | Cat#AG11701    |
| BCA Protein Assay Kit                          | Beyotime                                                                                                              | Cat#P0012      |
| Universal Mycoplasma Detection Kit             | ATCC                                                                                                                  | N/A            |
| CRISPR design tool                             | <a href="https://chopchop.cbu.uib.no">https://chopchop.cbu.uib.no</a>                                                 | N/A            |
| PROGeneV2                                      | <a href="http://www.progtools.net/gene/index.php">http://www.progtools.net/gene/index.php</a>                         | N/A            |
| CytoFLEX Flow Cytometer                        | Beckman Coulter, Inc.                                                                                                 | N/A            |
| GraphPad Prism 9                               | <a href="https://www.graphpad.com/scientific-software/prism/">https://www.graphpad.com/scientific-software/prism/</a> | N/A            |
| ImageJ                                         | <a href="https://imagej.nih.gov/ij/">https://imagej.nih.gov/ij/</a>                                                   | N/A            |

**Table S2. Primers and oligos used in this study**

| Name               | Sequence (5'-3')                         | Purpose                              |
|--------------------|------------------------------------------|--------------------------------------|
| Human ATF4 sgRNA-F | CACCGTTTGATAGAAGAGGTCCGCA                | Cloning of human ATF4 sgRNA          |
| Human ATF4 sgRNA-R | AAACTGCGGACCTCTTCTATCAAAC                | Cloning of human ATF4 sgRNA          |
| Mouse Atf4 sgRNA-F | CACCGAGATGAGCTCTTGACCACGT                | Cloning of mouse Atf4 sgRNA          |
| Mouse Atf4 sgRNA-R | AAACACGTGGTCAAGAGCTCATCTC                | Cloning of mouse Atf4 sgRNA          |
| Seq-plenti-1718    | AGGGCCTATTCCCATGATTC                     | Recombinant plasmid for sequencing   |
| SpeI-hATF4-F       | GACTAGTGCCACCATGA<br>CCGAAATGAGCTTCCTG   | Cloning of human ATF4 for expressing |
| SpeI-hATF4-R       | ATAGTTTAGCGGCCGCGGG<br>ACCCTTTCTTCCCC    | Cloning of human ATF4 for expressing |
| SpeI-mAtf4-F       | GACTAGTCCATGACCGAGATGAGCTTCCTGAA         | Cloning of mouse Atf4 for expressing |
| SpeI-mAtf4-R       | ATAAGAATGCGGCCGC<br>CGGAACTCTCTTCCCCCTTG | Cloning of mouse Atf4 for expressing |
| CMV-F              | CACCAAAAATCAAGGGACTT                     | Recombinant plasmid for sequencing   |
| mouse Actb-F       | GTGACGTTGACATCCGTAAAGA                   | Real-time quantitative PCR           |
| mouse Actb-R       | GCCGGACTCATCGTACTCC                      | Real-time quantitative PCR           |
| human ACTB-F       | CATGTACGTTGCTATCCAGGC                    | Real-time quantitative PCR           |
| human ACTB-R       | CTCCTTAATGTCACGCACGAT                    | Real-time quantitative PCR           |
| mouse Atf4-F       | CCTGAACAGCGAAGTGTTGG                     | Real-time quantitative PCR           |
| mouse Atf4-R       | TGGAGAACCCATGAGGTTTCAA                   | Real-time quantitative PCR           |
| human ATF4-F       | ATGACCGAAATGAGCTTCCTG                    | Real-time quantitative PCR           |
| human ATF4-R       | GCTGGAGAACCCATGAGGT                      | Real-time quantitative PCR           |
| mouse Relb-F       | CCAAAGCCGTTCTCCTTAATGTA                  | Real-time quantitative PCR           |
| mouse Relb-R       | GTTCCAGTGACCTCTCTTCCC                    | Real-time quantitative PCR           |
| human RelB-F       | CAGCCTCGTGGGGAAAGAC                      | Real-time quantitative PCR           |
| human RelB-R       | GCCCAGGTTGTTAAACTGTGC                    | Real-time quantitative PCR           |
| mouse Nfkb2-F      | TGGCATCCCCGAATATGATGA                    | Real-time quantitative PCR           |
| mouse Nfkb2-R      | TGACAGTAGGATAGGTCTTCCG                   | Real-time quantitative PCR           |
| human NFKB2-F      | ATGGAGAGTTGCTACAACCCA                    | Real-time quantitative PCR           |
| human NFKB2-R      | CTGTTCCACGATCACCAGGTA                    | Real-time quantitative PCR           |

Forward: F, Reverse: R, Human: h, Mouse: m

**Table S3. Antibodies used in this study**

| Antibodies                                                 | Source                    | Identifier                         | Dilution                     |
|------------------------------------------------------------|---------------------------|------------------------------------|------------------------------|
| rabbit anti-ATF4                                           | Proteintech               | Cat#10835-1-AP;<br>RRID:AB_2058600 | 1:1000 for WB; 1:300 for IHC |
| mouse anti-Luciferase                                      | Abbkine                   | Cat#ABM40300                       | 1:200 for IHC                |
| rabbit anti-MYC                                            | Proteintech               | Cat#10828-1-AP;<br>RRID:AB_2148585 | 1:1000 for WB                |
| rabbit anti-GAPDH                                          | Proteintech               | Cat#60004-1-Ig;<br>RRID:AB_2107436 | 1:20000 for WB               |
| mouse anti- $\beta$ -Actin                                 | Proteintech               | Cat#66009-1-Ig;<br>RRID:AB_2687938 | 1:5000 for WB                |
| mouse anti-PCNA                                            | Proteintech               | Cat#60097-1-Ig;<br>RRID:AB_2236728 | 1:1000 for WB                |
| rabbit anti-NIK                                            | Cell Signaling Technology | Cat#4994;<br>RRID:AB_2297422       | 1:1000 for WB                |
| rabbit anti-Phospho-IKK $\alpha$ / $\beta$<br>(Ser176/180) | Cell Signaling Technology | Cat#2697;<br>RRID:AB_2079382       | 1:1000 for WB                |
| rabbit anti-Phospho-NF- $\kappa$ B2<br>p100 (Ser866/870)   | Cell Signaling Technology | Cat#4810;<br>RRID:AB_659925        | 1:1000 for WB                |
| rabbit anti-NF- $\kappa$ B2 p100/p52                       | Cell Signaling Technology | Cat#4882;<br>RRID:AB_10695537      | 1:1000 for WB                |
| rabbit anti-RelB (C1E4)                                    | Cell Signaling Technology | Cat#492;<br>RRID:AB_2179173        | 1:1000 for WB                |
| rabbit anti-Caspase 3                                      | Cell Signaling Technology | Cat# 9665;<br>AB_2069872           | 1:1000 for WB                |
| rabbit anti-Cleaved Caspase 3                              | Abcam                     | Cat# 9661;<br>RRID:AB_2341188      | 1:1000 for WB                |
| rabbit anti-MLKL                                           | Abcam                     | Cat# ab184718;<br>RRID:AB_2755030  | 1:1000 for WB                |
| rabbit anti-MLKL<br>(phospho S345)                         | Abcam                     | Cat# ab196436;<br>RRID:AB_2687465  | 1:1000 for WB                |

WB: Western blot, IHC: Immunohistochemistry
